# Supplementary material
Source: PubMed Central journal article supplement (PMC5244311)
Supplement: AEM.02179-16_zam999117641s1.pdf [file AEM.02179-16_zam999117641s1.pdf]

## **SUPPLEMENTARY FIGURE CAPTIONS**

**SUPPLEMENTARY FIG 1** Clustering of matrices of Bray-Curtis dissimilarity indices among sites (treatments and inocula, INOC) using the weighted pair-group method (WPGMA) based on arithmetic averages. Each panel corresponds to one site. Upper plots in each panel show clusters based on bacterial phyla data, and lower plots in each panel show clusters based on cyanobacteria data.

Fort Bliss (FB)

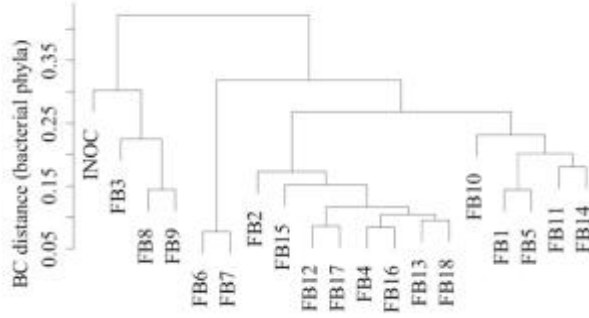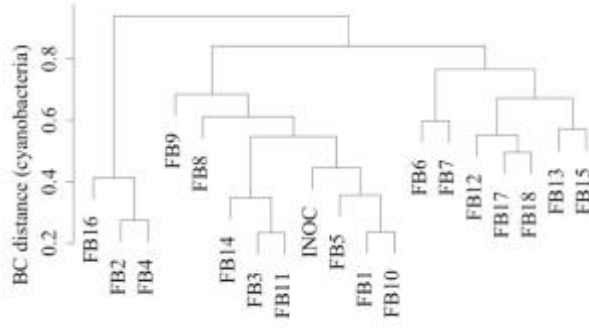

Jornada (J)

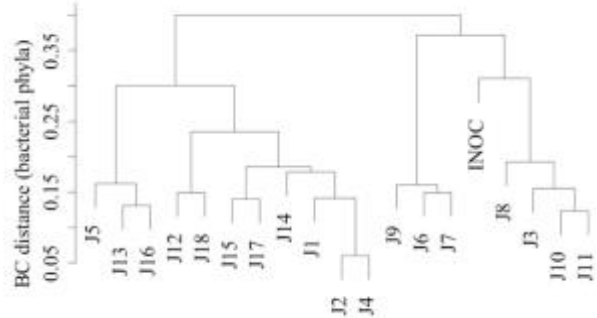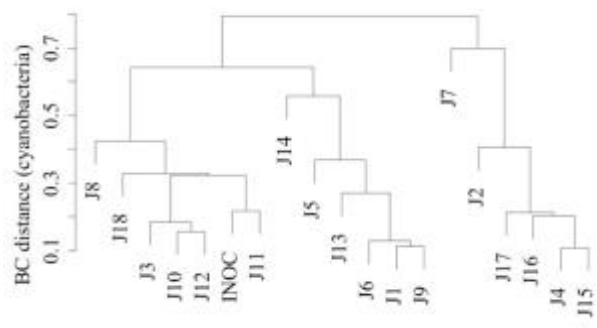

Nosecone (N)

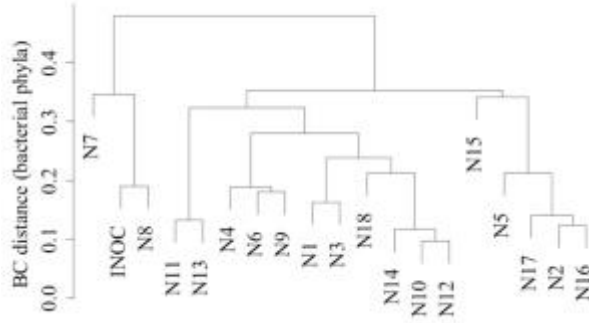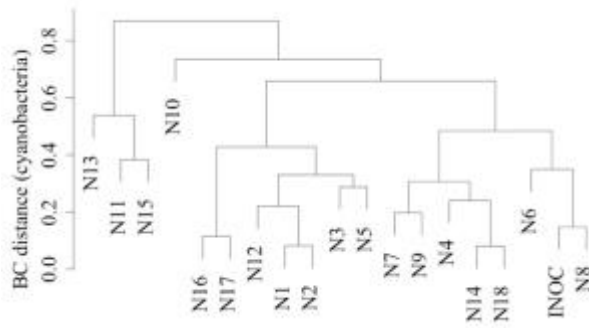

Burr Buttercup (BB)

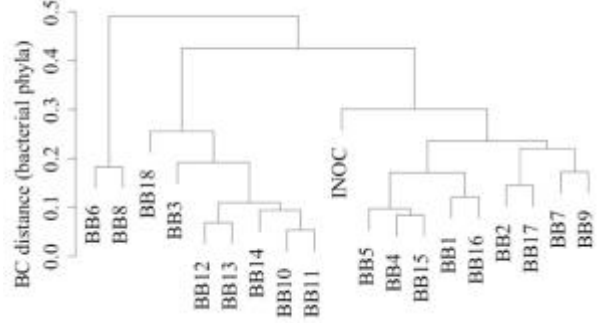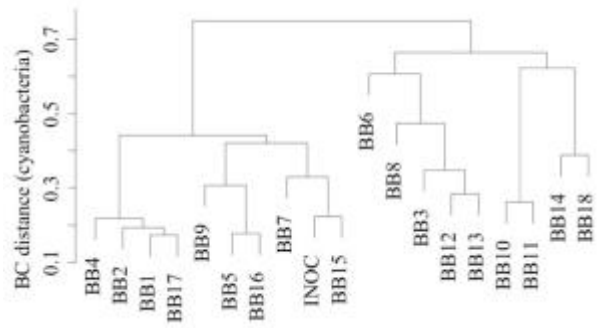

SUPPLEMENTARY FIG 1

**SUPPLEMENTARY TABLE 1** Results of one-way ANOVA tests after linear models fitted with the selected factors obtained after the preliminary screening process (Chl *a*, chlorophyll *a*; BC, Bray-Curtis dissimilarity index, as an estimate of community composition shift based on bacterial phyla and cyanobacteria)

| Source of variation         | Fort Bliss (FB) |          |          | Jornada (J) |          |          | Nosecone (N) |          |          | Burr Buttercup (BB) |          |          |
|-----------------------------|-----------------|----------|----------|-------------|----------|----------|--------------|----------|----------|---------------------|----------|----------|
|                             | df              | <i>F</i> | <i>p</i> | df          | <i>F</i> | <i>p</i> | df           | <i>F</i> | <i>p</i> | df                  | <i>F</i> | <i>p</i> |
| Model, Chl <i>a</i> content | 4               | 3.86     | 0.036    | 4           | 4.70     | 0.014    | 2            | 6.87     | 0.007    | 2                   | 9.19     | 0.002    |
| Error                       | 13              |          |          | 13          |          |          | 15           |          |          | 15                  |          |          |
| Total                       | 17              |          |          | 17          |          |          | 17           |          |          | 17                  |          |          |
| Model, BC (bacterial phyla) | 3               | 4.07     | 0.028    | 3           | 3.27     | 0.048    | 4            | 4.37     | 0.018    | 6                   | 9.13     | 0.001    |
| Error                       | 14              |          |          | 14          |          |          | 13           |          |          | 11                  |          |          |
| Total                       | 17              |          |          | 17          |          |          | 17           |          |          | 17                  |          |          |
| Model, BC (cyanobacteria)   |                 |          |          | 2           | 6.66     | 0.005    | 2            | 5.77     | 0.014    | 4                   | 5.97     | 0.006    |
| Error                       |                 |          |          | 15          |          |          | 15           |          |          | 13                  |          |          |
| Total                       |                 |          |          | 17          |          |          | 17           |          |          | 17                  |          |          |

**SUPPLEMENTARY TABLE 2** Total N and P content<sup>a</sup> in bulk soils from the different sites

|                                         | <b>Fort Bliss (FB)</b> | <b>Jornada (J)</b> | <b>Nosecone (N)</b> | <b>Burr Buttercup (BB)</b> |
|-----------------------------------------|------------------------|--------------------|---------------------|----------------------------|
| Total N ( $\mu\text{g N g soil}^{-1}$ ) | 17.23                  | 27.95              | 73.64               | 100.45                     |
| Total P ( $\mu\text{g P g soil}^{-1}$ ) | 3.66                   | 6.76               | 17.56               | 19.52                      |

<sup>a</sup>Total N was determined in a Perkin Elmer 2400 elemental analyzer after combustion according to standard methods of analyses (AOAC, Method 972.43, 1997). Total P was measured using the ammonium molybdate-ascorbic acid method and a Lachat QC8000 continuous flow colorimeter according to Mehlich (1978); samples were extracted into a bicarbonate solution which was then neutralized prior to analysis of total P

## **SUPPLEMENTARY REFERENCES**

1. **Mellich, A.** 1978. New extractant for soil test evaluation of phosphorus, potassium, magnesium, calcium, sodium, manganese, and zinc. *Commun Soil Sci Plant Anal* **9**:477–492.
